# Supplementary material for: The growing metaverse sector can reduce greenhouse gas emissions by 10 Gt CO2e in the united states by 2050
Source: Royal Society of Chemistry journal article supplement (doi:10.1039/d3ee00081h), 2023-01-01
Supplement: d3ee00081h1.pdf [file d3ee00081h1.pdf]

Supplementary Information for

## **Growing Metaverse Sector Can Reduce Greenhouse Gas Emissions by 10 Gt CO<sub>2</sub>e in the United States by 2050**

**Authors:** Ning Zhao<sup>1</sup>, Fengqi You<sup>1,2,3\*</sup>

**Affiliation:**

<sup>1</sup> Systems Engineering, Cornell University, Ithaca, New York, 14853, USA

<sup>2</sup> Robert Frederick Smith School of Chemical and Biomolecular Engineering, Cornell University, Ithaca, New York, 14853, USA

<sup>3</sup> Cornell Atkinson Center for Sustainability, 340 Tower Road Cornell University Ithaca, Ithaca, NY, 14853, USA

Supplementary Notes 1 to 4

Supplementary Figs. 1 to 3

Supplementary Tables 1 to 4

---

\* Corresponding author. Phone: (607) 255-1162; Fax: (607) 255-9166; E-mail: [fengqi.you@cornell.edu](mailto:fengqi.you@cornell.edu)

## Supplementary Note 1: Adoption curves for the metaverse growth

Supplementary Fig. 1 projects the adoption growth trajectories for each of the applications in the metaverse sector, including metaverse-based remote work, virtual traveling, distance learning, gaming, and non-fungible token (NFT). The consequent reduction of the non-virtual counterpart of the metaverse-based applications is also visualized in orange. Distance education in the metaverse is categorized into K-12 and post-secondary. The blue curves and blue areas indicate the nominal expansion trajectory and growth deviations of the metaverse, respectively. The orange curves and orange areas represent the physical-world counterparts for the projected nominal metaverse growth trend and adoption deviations, respectively.

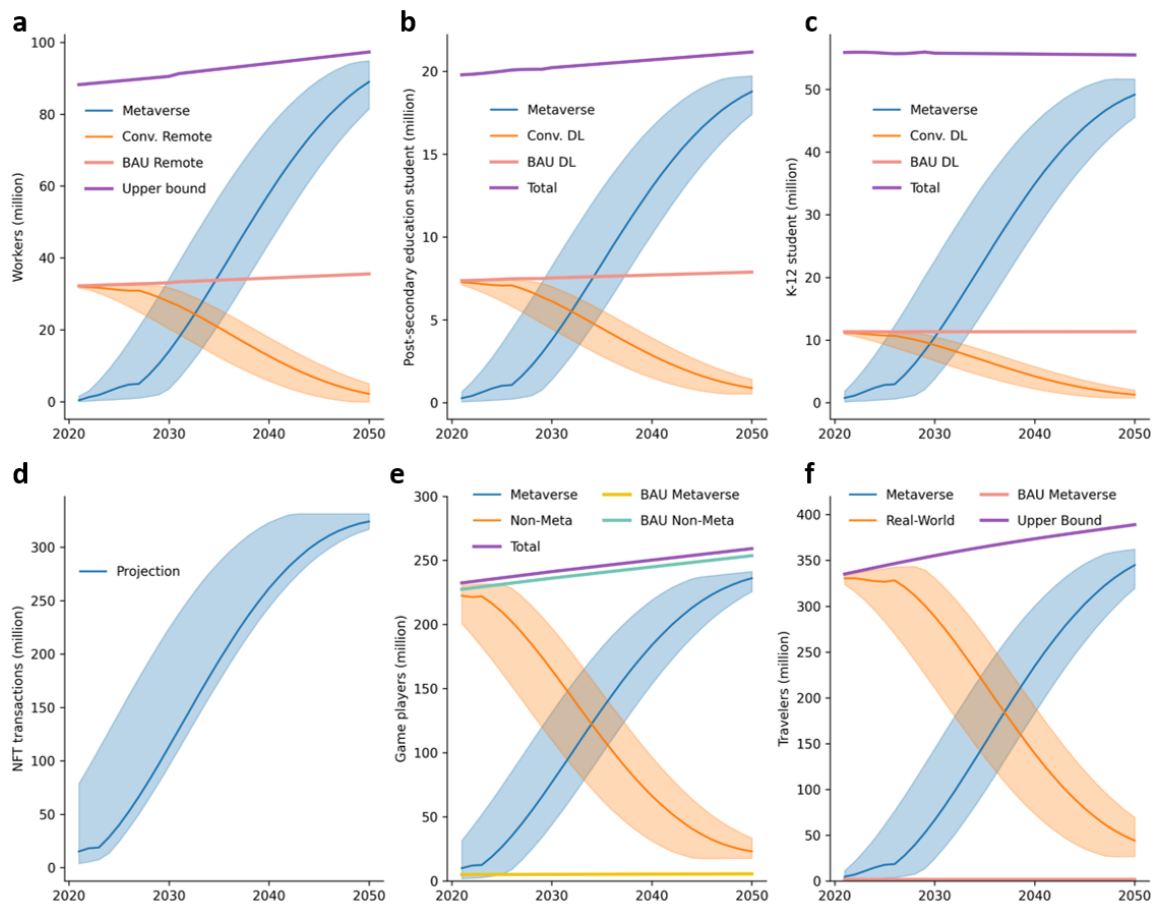

**Supplementary Fig. 1 Projected expansion trajectories for metaverse applications and non-virtual counterparts. a**, Metaverse-based remote working. **b**, Metaverse-based distance learning for post-secondary education. **c**, Metaverse-based distance learning for K-12 education. **d**, Non-fungible token. **e**, Gaming in the metaverse. **f**, Metaverse-based virtual traveling.

## **Supplementary Note 2: Electricity consumption for all metaverse growing scenarios**

Supplementary Fig. 2 presents the impacts of the metaverse sector growth on the electric power sector by source throughout the coming decades. The stacked areas in each subgraph depict the scenario with the nominal projected metaverse growth trajectory, while the deviations from the slower and faster metaverse adoption deviations are plotted in purple and orange curves. The total annual electricity consumption in the business-as-usual scenario without metaverse industry expansion is presented on the top of each subgraph in grey. Three energy systems projections, namely the reference projection, the projection with low renewable energy cost, and the projection with high renewable energy cost, are obtained from the Energy Information Administration (EIA)<sup>1</sup>.

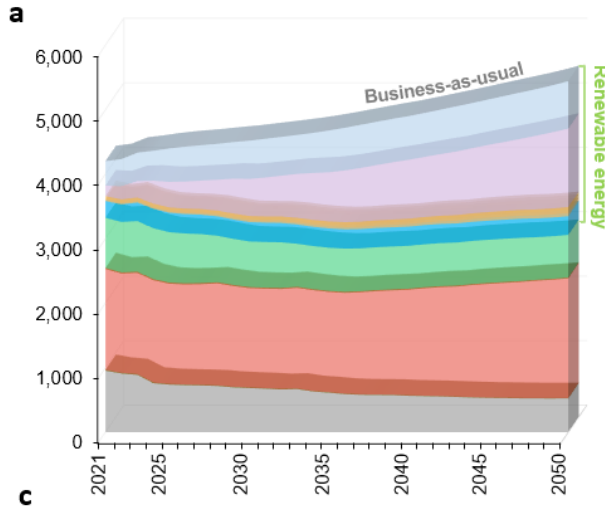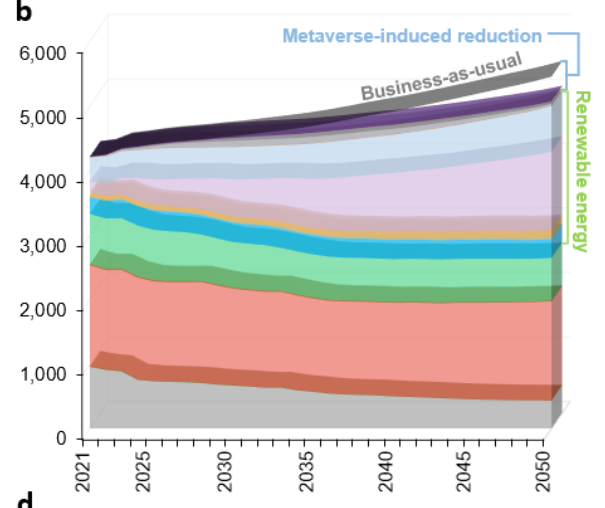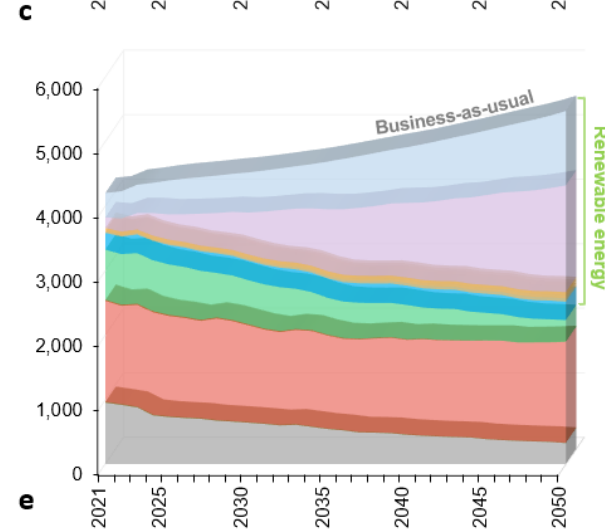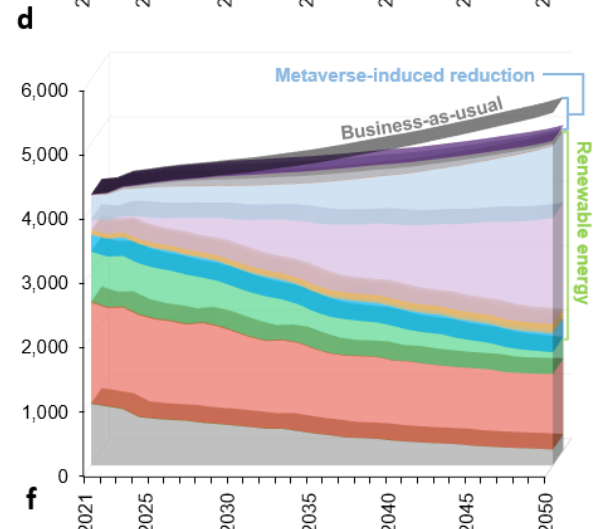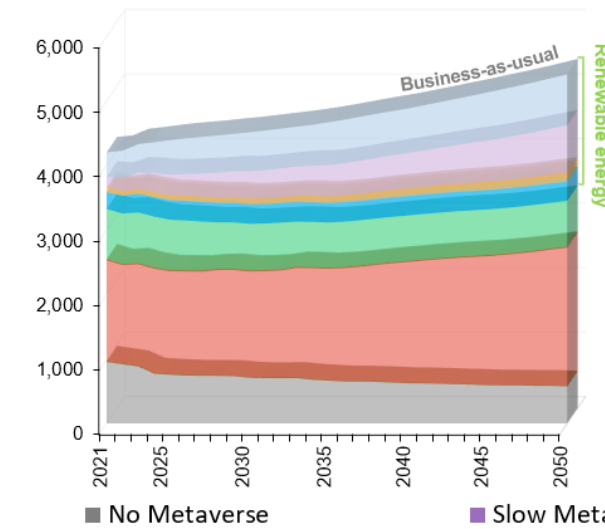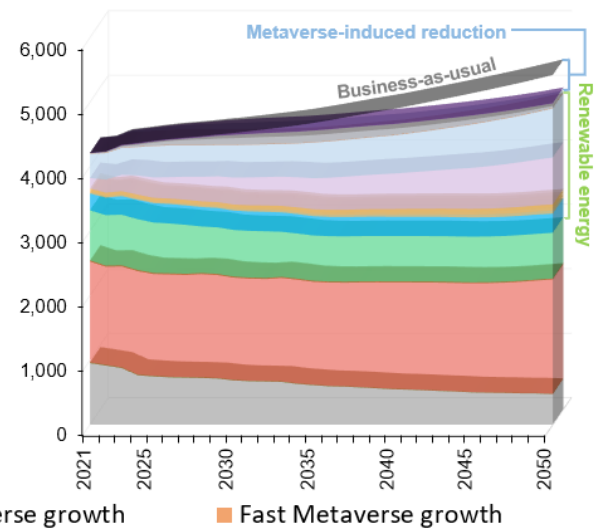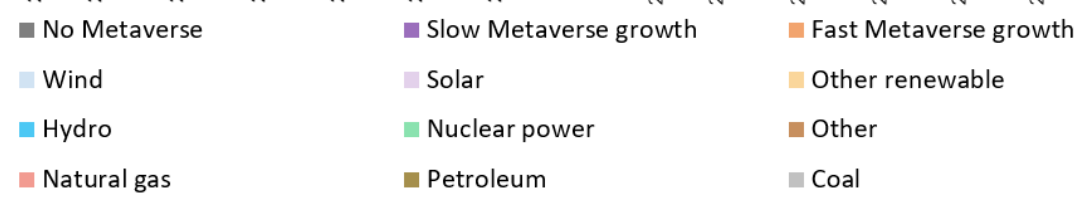

**Supplementary Fig. 2 Impacts of the metaverse sector growth on the electric power systems in TWh by year and energy source.** **a**, Reference scenario without rapid growth of the metaverse. **b**, Reference scenario with the rapid growth of the metaverse. **c**, Scenario with low renewable energy cost and without rapid metaverse growth. **d**, Scenario with low renewable energy cost and the rapid metaverse growth. **e**, Scenario with high renewable energy cost and without rapid metaverse growth. **f**, Scenario with high renewable energy cost and the rapid metaverse growth. Grey surfaces in scenarios with metaverse growth (**b**, **d**, and **f**) indicate the overall electricity consumption in the corresponding business-as-usual scenarios (**a**, **c**, and **e**), while the purple and orange curves depict the deviations owing to the slower or faster metaverse growth compared to the projected nominal growth rate.

### Supplementary Note 3: Energy efficiency projections

Supplementary Table 1 lists the projected power efficiency improvements for electricity-consuming activities throughout the metaverse expansion period of three decades. Supplementary Table 2 presents the energy efficiency improvements for natural gas and petroleum, and the fuel efficiency of petroleum is measured by miles per gallon (MPG). The market share and power efficiency information of gaming platforms are listed in Supplementary Table 3.

**Supplementary Table 1** Electricity efficiency projections by activity throughout the metaverse industry expansion period<sup>1-4</sup>.

| Year | Space Heating | Space Cooling | Water Heating | Refrigeration | Cooking | Freezer | Light | Dishwasher | Computer |
|------|---------------|---------------|---------------|---------------|---------|---------|-------|------------|----------|
| 2021 | 100%          | 100%          | 100%          | 100%          | 100%    | 100%    | 100%  | 100%       | 100%     |
| 2022 | 101%          | 101%          | 101%          | 102%          | 100%    | 102%    | 104%  | 101%       | 105%     |
| 2023 | 102%          | 103%          | 101%          | 103%          | 100%    | 103%    | 108%  | 102%       | 111%     |
| 2024 | 103%          | 104%          | 102%          | 105%          | 100%    | 105%    | 112%  | 103%       | 117%     |
| 2025 | 104%          | 106%          | 102%          | 107%          | 100%    | 107%    | 115%  | 104%       | 123%     |
| 2026 | 105%          | 107%          | 103%          | 108%          | 100%    | 108%    | 118%  | 105%       | 129%     |
| 2027 | 105%          | 108%          | 104%          | 110%          | 101%    | 110%    | 121%  | 106%       | 136%     |
| 2028 | 106%          | 110%          | 104%          | 111%          | 101%    | 111%    | 125%  | 106%       | 143%     |
| 2029 | 107%          | 111%          | 105%          | 112%          | 101%    | 112%    | 129%  | 107%       | 151%     |
| 2030 | 108%          | 112%          | 105%          | 114%          | 101%    | 114%    | 135%  | 108%       | 159%     |
| 2031 | 108%          | 113%          | 105%          | 115%          | 101%    | 115%    | 142%  | 108%       | 167%     |
| 2032 | 109%          | 114%          | 106%          | 116%          | 101%    | 116%    | 148%  | 109%       | 176%     |
| 2033 | 110%          | 114%          | 106%          | 117%          | 101%    | 117%    | 154%  | 110%       | 185%     |
| 2034 | 110%          | 115%          | 106%          | 118%          | 101%    | 118%    | 159%  | 110%       | 195%     |
| 2035 | 111%          | 115%          | 106%          | 119%          | 101%    | 119%    | 165%  | 110%       | 205%     |
| 2036 | 111%          | 116%          | 106%          | 119%          | 101%    | 119%    | 170%  | 111%       | 216%     |
| 2037 | 111%          | 116%          | 106%          | 120%          | 101%    | 120%    | 175%  | 111%       | 227%     |
| 2038 | 111%          | 116%          | 106%          | 120%          | 101%    | 120%    | 179%  | 111%       | 239%     |
| 2039 | 111%          | 117%          | 106%          | 121%          | 101%    | 121%    | 183%  | 112%       | 252%     |
| 2040 | 112%          | 117%          | 106%          | 121%          | 101%    | 121%    | 188%  | 112%       | 265%     |
| 2041 | 112%          | 117%          | 106%          | 121%          | 101%    | 121%    | 193%  | 112%       | 279%     |
| 2042 | 112%          | 117%          | 106%          | 121%          | 101%    | 121%    | 198%  | 113%       | 293%     |
| 2043 | 112%          | 117%          | 106%          | 121%          | 101%    | 121%    | 202%  | 113%       | 309%     |
| 2044 | 112%          | 117%          | 106%          | 121%          | 101%    | 121%    | 205%  | 113%       | 326%     |
| 2045 | 112%          | 117%          | 106%          | 121%          | 101%    | 121%    | 208%  | 113%       | 342%     |
| 2046 | 112%          | 117%          | 106%          | 121%          | 101%    | 121%    | 211%  | 113%       | 361%     |
| 2047 | 112%          | 117%          | 106%          | 121%          | 101%    | 121%    | 214%  | 113%       | 379%     |
| 2048 | 112%          | 117%          | 106%          | 121%          | 101%    | 121%    | 216%  | 114%       | 400%     |
| 2049 | 112%          | 117%          | 106%          | 121%          | 101%    | 121%    | 219%  | 114%       | 420%     |
| 2050 | 112%          | 117%          | 106%          | 121%          | 101%    | 121%    | 221%  | 114%       | 442%     |

**Supplementary Table 2** Fossil fuel efficiency projections by activity for natural gas (NG) and for transportation petroleum (MPG stands for miles per gallon) <sup>1,3-5</sup>.

| Year | Gasoline MPG | Diesel MPG | NG for Space Heating | NG for space Cooling | NG for Water Heating | NG for Cooking | NG for Clothes Dryers |
|------|--------------|------------|----------------------|----------------------|----------------------|----------------|-----------------------|
| 2021 | 24.5         | 10.7       | 100%                 | 100%                 | 100%                 | 100%           | 100%                  |
| 2022 | 25           | 10.9       | 101%                 | 100%                 | 101%                 | 100%           | 100%                  |
| 2023 | 25.5         | 11.1       | 101%                 | 100%                 | 101%                 | 100%           | 100%                  |
| 2024 | 26           | 11.4       | 102%                 | 100%                 | 101%                 | 100%           | 100%                  |
| 2025 | 26.5         | 11.6       | 102%                 | 100%                 | 102%                 | 100%           | 100%                  |
| 2026 | 27           | 11.8       | 102%                 | 100%                 | 102%                 | 100%           | 100%                  |
| 2027 | 27.4         | 12         | 103%                 | 100%                 | 102%                 | 100%           | 100%                  |
| 2028 | 27.8         | 12.1       | 103%                 | 100%                 | 102%                 | 100%           | 100%                  |
| 2029 | 28.2         | 12.3       | 104%                 | 100%                 | 102%                 | 100%           | 100%                  |
| 2030 | 28.6         | 12.5       | 104%                 | 100%                 | 102%                 | 100%           | 100%                  |
| 2031 | 28.9         | 12.6       | 104%                 | 100%                 | 102%                 | 100%           | 100%                  |
| 2032 | 29.2         | 12.8       | 105%                 | 100%                 | 101%                 | 100%           | 100%                  |
| 2033 | 29.5         | 12.9       | 105%                 | 100%                 | 101%                 | 100%           | 100%                  |
| 2034 | 29.8         | 13         | 105%                 | 100%                 | 101%                 | 100%           | 100%                  |
| 2035 | 30.1         | 13.1       | 105%                 | 100%                 | 101%                 | 100%           | 100%                  |
| 2036 | 30.3         | 13.2       | 105%                 | 100%                 | 101%                 | 100%           | 100%                  |
| 2037 | 30.5         | 13.3       | 105%                 | 100%                 | 101%                 | 100%           | 100%                  |
| 2038 | 30.7         | 13.4       | 105%                 | 100%                 | 101%                 | 100%           | 100%                  |
| 2039 | 30.9         | 13.5       | 105%                 | 100%                 | 101%                 | 100%           | 100%                  |
| 2040 | 31.1         | 13.6       | 105%                 | 100%                 | 101%                 | 100%           | 100%                  |
| 2041 | 31.3         | 13.7       | 105%                 | 100%                 | 101%                 | 100%           | 100%                  |
| 2042 | 31.4         | 13.7       | 105%                 | 100%                 | 101%                 | 100%           | 100%                  |
| 2043 | 31.6         | 13.8       | 105%                 | 100%                 | 101%                 | 100%           | 100%                  |
| 2044 | 31.7         | 13.8       | 105%                 | 100%                 | 101%                 | 100%           | 100%                  |
| 2045 | 31.8         | 13.9       | 105%                 | 100%                 | 101%                 | 100%           | 100%                  |
| 2046 | 31.9         | 13.9       | 105%                 | 100%                 | 101%                 | 100%           | 100%                  |
| 2047 | 32.1         | 14         | 105%                 | 100%                 | 101%                 | 100%           | 100%                  |
| 2048 | 32.2         | 14         | 105%                 | 100%                 | 101%                 | 100%           | 100%                  |
| 2049 | 32.2         | 14.1       | 105%                 | 100%                 | 101%                 | 100%           | 100%                  |
| 2050 | 32.3         | 14.1       | 105%                 | 100%                 | 101%                 | 100%           | 100%                  |

**Supplementary Table 3** Market shares and power efficiency of gaming platforms in 2021<sup>6-8</sup>.

| Gaming platform                              | Market share | Power efficiency (W) |
|----------------------------------------------|--------------|----------------------|
| Windows based desktop/laptop                 | 15.6%        | 400                  |
| Sony PlayStation 4                           | 13.1%        | 120                  |
| Apple based mobile device (iPod/iPad/iPhone) | 10.1%        | 5.4                  |
| Microsoft Xbox 360                           | 9.9%         | 160                  |
| Microsoft Xbox One                           | 9.7%         | 105                  |
| Sony PlayStation 3                           | 7.3%         | 170                  |
| Apple based desktop/laptop                   | 6.9%         | 40                   |

|                              |      |     |
|------------------------------|------|-----|
| Nintendo Wii U               | 6.0% | 34  |
| Nintendo 3DS/2DS             | 4.9% | 4.1 |
| Nintendo New 3DS/3DS XL      | 3.4% | 5.8 |
| Sony PlayStation Vita        | 3.4% | 7.5 |
| Nintendo Wii                 | 3.3% | 40  |
| Nintendo Switch              | 2.9% | 16  |
| Sony PlayStation 2           | 0.7% | 50  |
| Nintendo DS/Lite             | 0.7% | 2.3 |
| Sony PSP                     | 0.5% | 3.5 |
| Nintendo DSI/DSI XL          | 0.4% | 3.1 |
| Microsoft Xbox               | 0.2% | 74  |
| Nintendo 64                  | 0.2% | 19  |
| Sony PSP Go                  | 0.2% | 3.5 |
| Nintendo Game Boy Advance/SP | 0.2% | 1.8 |
| Nintendo GameCube            | 0.2% | 23  |
| Sony PlayStation             | 0.2% | 10  |
| Nintendo Game Boy/Color      | 0.1% | 0.7 |

---



## Supplementary Note 4: Deviations in the scenario without metaverse

Supplementary Fig. 3 lists the breakdowns for annual electricity consumption by source in the scenario without metaverse, as well as the emissions breakdowns by metaverse-based application and by energy source. Emissions breakdowns in **b-d** are presented by greenhouse gas (GHG), NO<sub>x</sub>, and SO<sub>x</sub>.

Supplementary Table 4 lists the prospective analysis results for the scenario without the metaverse industry. Namely, there exists no metaverse-based application in this scenario. The impacts are represented by deviations compared to the business-as-usual scenario with the reference energy system projection. The energy analysis results include deviations in domestic total energy consumption and nationwide electricity usage. The emissions are quantified by greenhouse gas, NO<sub>x</sub>, and SO<sub>x</sub>.

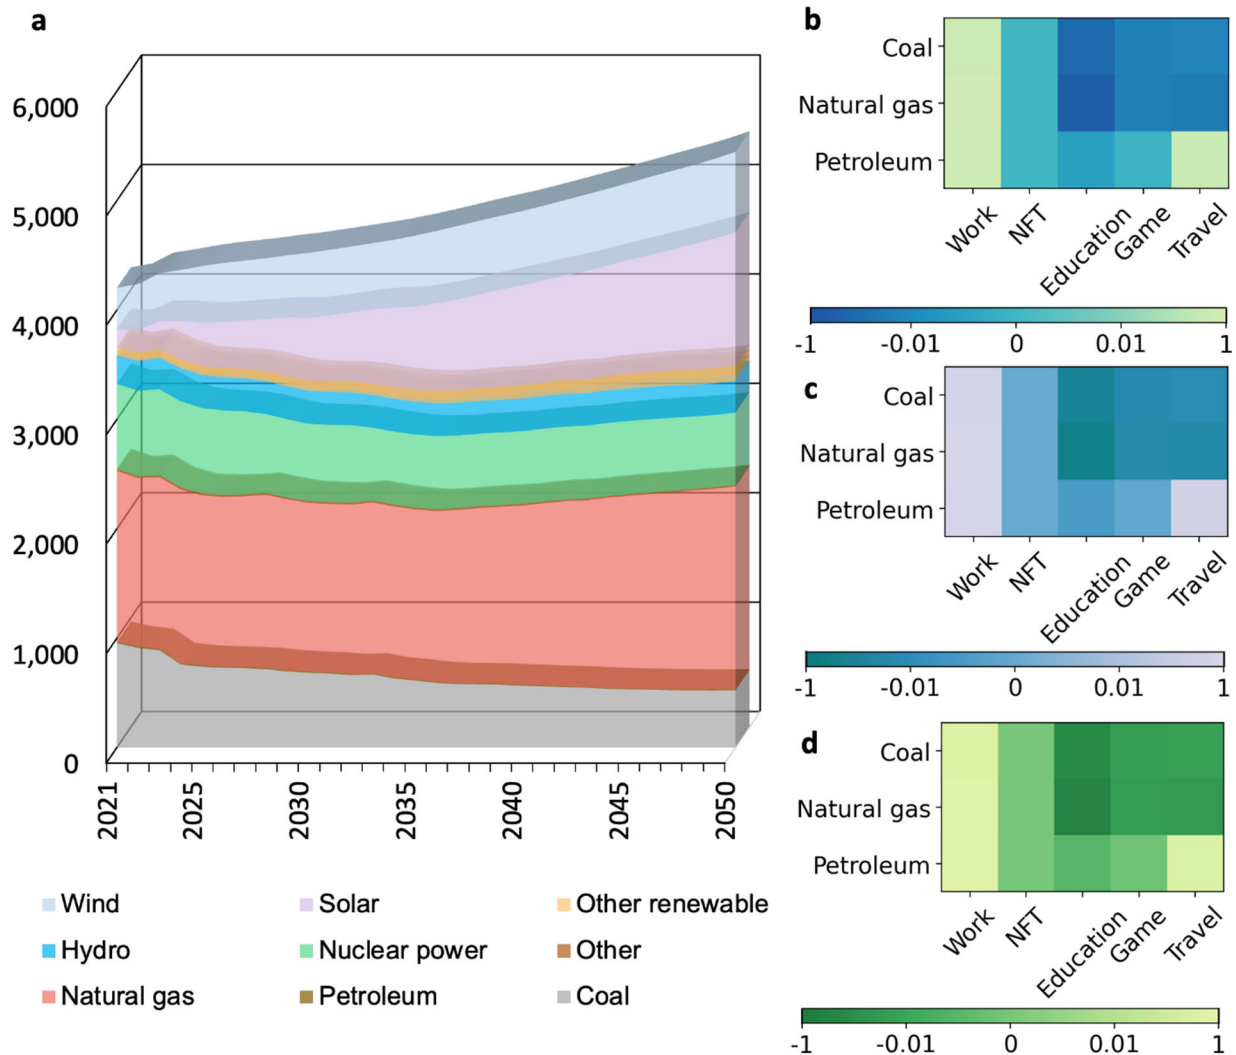

**Supplementary Fig. 3 Electricity consumption breakdowns, greenhouse gas (GHG), NO<sub>x</sub>, and SO<sub>x</sub> breakdowns for the scenario without metaverse.** **a**, annual electricity consumption breakdowns by source and by year for the scenario with no metaverse. **b-d**, Emissions increases and reductions by metaverse application and by energy source in 2050 for GHG, NO<sub>x</sub>, and SO<sub>x</sub>. The values are measured by TWh in **a**. The units for **b**, **c**, and **d** are Mt CO<sub>2e</sub>, kt NO<sub>x</sub>, and kt SO<sub>x</sub>, respectively.

**Supplementary Table 4** Energy consumption, greenhouse gas emissions, and gaseous air pollution deviations throughout the analysis period of three decades in the scenario without metaverse.

| Deviations in the scenario without metaverse                   | Amount |
|----------------------------------------------------------------|--------|
| Domestic total energy consumption increase (PJ)                | 764.7  |
| Domestic electricity consumption increase (TWh)                | 49.2   |
| Total greenhouse gas emissions increase (Mt CO <sub>2e</sub> ) | 63.8   |
| Total NO <sub>x</sub> emissions increase (kt)                  | 56.9   |
| Total SO <sub>x</sub> emissions increase (kt)                  | 14.6   |

## References

- 1 Energy Information Administration, U.S. Department of Energy. Annual Energy Outlook 2022 (2022) (Accessed 06/25/2022).
- 2 Andrae, A. S. G. & Edler, T. On Global Electricity Usage of Communication Technology: Trends to 2030. *Challenges* **6**, 117-157, (2015).
- 3 Energy Information Administration, U.S. Department of Energy. Commercial Buildings Energy Consumption Survey (CBECS) in 2012 (2016) (Accessed 06/25/2022).
- 4 Energy Information Administration, U.S. Department of Energy. Residential Energy Consumption Survey (RECS) in 2015 (2018) (Accessed 06/25/2022).
- 5 Bureau of Transportation Statistics, U.S. Department of Transportation. National Transportation Statistics, (2021) (Accessed 06/25/2022).
- 6 Statista. United States: Which Gaming Platforms Do You Regularly Use? (2021) (Accessed 07/02/2022).
- 7 TPCDB. The Power Consumption Database (2022) (Accessed 07/02/2022).
- 8 Delforge, P., Natural Resources Defense Council,. The Latest-Generation Video Game Consoles (2014) (Accessed 07/02/2022).
